# Supplementary material
Source: PubMed Central journal article supplement (PMC8670518)
Supplement: pnas.2108325118.sapp.pdf [file pnas.2108325118.sapp.pdf]

2 **Supplementary Information for**

3 ***In situ* investigation of water on MXene Interfaces**

4 **Wahid Zaman, Ray Matsumoto, Matthew W. Thompson, Yu-Hsuan Liu, Yousuf Bootwala, Marm B. Dixit, Ethan Crumlin, Marta**  
5 **C. Hatzell, Peter T. Cummings and Kelsey B. Hatzell**

6 **Kelsey B. Hatzell.**  
7 **E-mail: [kelsey.hatzell@princeton.edu](mailto:kelsey.hatzell@princeton.edu)**

8 **This PDF file includes:**

- 9 Figs. S1 to S12
- 10 Tables S1 to S8
- 11 SI References

12 **Peak fitting.** For peak fitting, CasaXPS software was used for data analysis. During spectra acquisition at 800eV, presence  
13 of Auger peaks was observed, which can be located by comparing 900eV spectra (Fig. S9). To eliminate the effect of Auger  
14 peaks, a background subtraction was carried on (for C1s). The final peaks were corrected by using Tougaard background. For  
15 best fitting, a modified asymmetric Lorentzian lineshape (LF) was chosen for O1s and C1s peaks. The rest were fitted using  
16 Gaussian Lorentzian (GL) lineshape. The XPS spectra was calibrated to TiC-T<sub>x</sub> component of C1s spectra at 282V. It should  
17 be noted that, the Fermi edges of the MXene samples were not sharp enough to locate the 0 eV. Therefore, an alternative  
18 calibration approach was implemented by referencing to the TiC-T<sub>x</sub> peak. Binding energies and FWHM for the peaks are  
19 listed in Table S1-S3.

20 **T<sub>x</sub><sup>-</sup> mole number calculation.** Surface termination groups for MXene samples were determined by first calculating the global  
21 atomic percentage of all elements:

$$X_i = \frac{C_i}{\sum_{j=1}^m C_j}$$
$$C_i = \frac{I_i}{R_i}$$

22 Where  $X_i$ = Atomic fraction of element i,  $C_i$  = intensity of element i and  $\sum_{j=1}^m C_j$  = Cumulative intensity of all elements,  $I_i$ =  
23 integrated area of element i,  $R_i$ = Relative sensitivity factor (RSF) of element i.

24 T<sub>x</sub><sup>-</sup> mole numbers were calculated by taking the areal fraction of each species (-O, -F, -OH, -H<sub>2</sub>O) from O1s and F1s spectra,  
25 multiplied by the global atomic percentage of the respective species. The amount of TiO<sub>2</sub> was calculated from Ti2P spectra  
26 and O-TiC from O1s was accounted from that accordingly.

27 **Relative sensitivity factor.** The relative sensitivity factors (RSFs) for beamline 9.3.2 were calculated using four correction  
28 parameters (the flux of the beamline, the analyzer transmission function, the differential cross section, and the inelastic mean  
29 free path). The flux was directly measured using a photodiode at the position of the sample and the analyzer transmission  
30 function was deduced from the intensity of Au 4f spectra of a clean gold foil at a series of excitation energies using the same  
31 data correction procedure, except for the inelastic mean free path, which was calculated with values calculated from optical  
32 properties of the elements (1). The differential cross sections were obtained by assuming random orientation of grains and using  
33 an angle between polarization vector and photoelectron direction of 20 (2). The inelastic mean free path was calculated with the  
34 predictive TPP-2M formula in an iterative manner: the material parameters entering the equation, i.e. the density, the number  
35 of valence electrons, and the molar mass, were calculated from the sum formula, which was initially guessed and improved  
36 iteratively, based on the outcome of the composition analysis. The band gap (another parameter in the TPP-2M formula) was  
37 assumed to be 0 eV. The density was calculated from the sum formula and the volume of the unit cell obtained from XRD.  
38 The effect of the volume changes on the relative sensitivity factors were negligible. Eight s- and p-orbital valence electrons of  
39 titanium are typically categorized as high-binding energy valence electrons and were not accounted for the calculation of the  
40 inelastic mean free path (3). The product of the four correction factors were normalized to the resulting values of C 1s. The  
41 RSF values for all elements are shown in Table S8.

**Table S1. XPS peak fitting results of neat Ti<sub>3</sub>C<sub>2</sub>T<sub>x</sub> at 100 mTorr vapor pressure**

| Region                                       | Temperature | BE[eV]          | FWHM        | Fraction     | Component              | Reference |
|----------------------------------------------|-------------|-----------------|-------------|--------------|------------------------|-----------|
| Ti 2p <sub>3/2</sub><br>(2p <sub>1/2</sub> ) | 25°C        | 455.07 (460.77) | 1.7 (2)     | 0.19 (0.09)  | Ti <sup>+</sup>        | (4)       |
|                                              |             | 456.06 (461.76) | 1.8 (1.74)  | 0.2 (0.1)    | Ti <sup>2+</sup>       | (4)       |
|                                              |             | 457.35 (463.05) | 1.8 (1.68)  | 0.13 (0.067) | Ti <sup>3+</sup>       | (4)       |
|                                              |             | 458.77 (464.47) | 1.7 (2.28)  | 0.11 (0.055) | TiO <sub>2</sub>       | (5)       |
|                                              |             | 460 (465.70)    | 1.8 (2.97)  | 0.03 (0.015) | TiC-T <sub>x</sub>     | (6)       |
| Ti 2p <sub>3/2</sub><br>(2p <sub>1/2</sub> ) | 200°C       | 455 (460.7)     | 1.7 (2.15)  | 0.18 (0.09)  | Ti <sup>+</sup>        | (4)       |
|                                              |             | 456.02 (461.72) | 1.8 (1.78)  | 0.22 (0.11)  | Ti <sup>2+</sup>       | (4)       |
|                                              |             | 457.24 (462.94) | 1.7 (1.55)  | 0.11 (0.054) | Ti <sup>3+</sup>       | (4)       |
|                                              |             | 458.53 (464.23) | 1.72 (2.17) | 0.12 (0.058) | TiO <sub>2</sub>       | (5)       |
|                                              |             | 460 (465.70)    | 1.8 (2.93)  | 0.04 (0.02)  | TiC-T <sub>x</sub>     | (6)       |
| O1s                                          | 25°C        | 529.80          | 1.58        | 0.3          | TiO <sub>2</sub>       | (7)       |
|                                              |             | 530.70          | 1.62        | 0.3          | TiC-O                  | (8)       |
|                                              |             | 531.95          | 1.62        | 0.18         | TiC-OH                 | (7)       |
|                                              |             | 533.08          | 1.58        | 0.088        | H <sub>2</sub> O       | (7)       |
|                                              |             | 534.84          | 1.58        | 0.12         | gp-H <sub>2</sub> O    | (7)       |
| O1s                                          | 200°C       | 529.79          | 1.58        | 0.39         | TiO <sub>2</sub>       | (7)       |
|                                              |             | 530.73          | 1.62        | 0.31         | TiC-O                  | (8)       |
|                                              |             | 531.94          | 1.62        | 0.17         | TiC-OH                 | (7)       |
|                                              |             | 533.08          | 1.58        | 0.044        | H <sub>2</sub> O       | (7)       |
|                                              |             | 534.78          | 1.58        | 0.087        | gp-H <sub>2</sub> O    | (7)       |
| C1s                                          | 25°C        | 282             | 1.3         | 0.494        | TiC-T <sub>x</sub>     | (8)       |
|                                              |             | 284.52          | 2.04        | 0.505        | C-C/CH <sub>x</sub>    | (9)       |
| C1s                                          | 200°C       | 281.98          | 1.31        | 0.47         | TiC-T <sub>x</sub>     | (8)       |
|                                              |             | 284.5           | 2.05        | 0.53         | C-C/CH <sub>x</sub>    | (9)       |
| F1s                                          | 25°C        | 684.9           | 1.63        | 0.9          | TiC-(O,F) <sub>x</sub> | (8)       |
|                                              |             | 686.7           | 1.2         | 0.1          | AlF <sub>x</sub>       | (10)      |
| F1s                                          | 200°C       | 684.9           | 1.72        | 0.87         | TiC-(O,F) <sub>x</sub> | (8)       |
|                                              |             | 686.82          | 1.54        | 0.13         | AlF <sub>x</sub>       | (10)      |

**Table S2. XPS peak fitting results of Li-Ti<sub>3</sub>C<sub>2</sub>T<sub>x</sub> at 100 mTorr vapor pressure**

| Region                                       | Temperature | BE[eV]          | FWHM        | Fraction      | Component              | Reference |
|----------------------------------------------|-------------|-----------------|-------------|---------------|------------------------|-----------|
| Ti 2p <sub>3/2</sub><br>(2p <sub>1/2</sub> ) | 25°C        | 455.05 (460.75) | 1.7 (2.5)   | 0.10 (0.05)   | Ti <sup>+</sup>        | (4)       |
|                                              |             | 455.80 (461.50) | 1.81 (1.44) | 0.14 (0.07)   | Ti <sup>2+</sup>       | (4)       |
|                                              |             | 457.15 (462.85) | 1.8 (1.52)  | 0.12 (0.059)  | Ti <sup>3+</sup>       | (4)       |
|                                              |             | 459 (464.7)     | 1.66 (2.38) | 0.24 (0.12)   | TiO <sub>2</sub>       | (5)       |
|                                              |             | 460 (465.70)    | 1.81 (3.2)  | 0.063 (0.031) | TiC-T <sub>x</sub>     | (6)       |
| Ti 2p <sub>3/2</sub><br>(2p <sub>1/2</sub> ) | 200°C       | 455.15 (460.85) | 1.7 (2.42)  | 0.11 (0.057)  | Ti <sup>+</sup>        | (4)       |
|                                              |             | 455.75 (461.45) | 1.81 (1.45) | 0.12 (0.06)   | Ti <sup>2+</sup>       | (4)       |
|                                              |             | 457.07 (462.77) | 1.45 (1.8)  | 0.13 (0.066)  | Ti <sup>3+</sup>       | (4)       |
|                                              |             | 458.97 (464.67) | 1.6 (2.38)  | 0.25 (0.125)  | TiO <sub>2</sub>       | (5)       |
|                                              |             | 460 (465.70)    | 1.81 (3.3)  | 0.05 (0.025)  | TiC-T <sub>x</sub>     | (6)       |
| O1s                                          | 25°C        | 530.35          | 1.62        | 0.33          | TiO <sub>2</sub>       | (7)       |
|                                              |             | 531.3           | 1.58        | 0.25          | TiC-O                  | (8)       |
|                                              |             | 532.50          | 1.58        | 0.165         | TiC-OH                 | (7)       |
|                                              |             | 533.50          | 1.62        | 0.15          | H <sub>2</sub> O       | (7)       |
|                                              |             | 534.98          | 1.62        | 0.1           | gp-H <sub>2</sub> O    | (7)       |
| O1s                                          | 200°C       | 530.30          | 1.62        | 0.47          | TiO <sub>2</sub>       | (7)       |
|                                              |             | 531.3           | 1.59        | 0.29          | TiC-O                  | (8)       |
|                                              |             | 532.50          | 1.58        | 0.144         | TiC-OH                 | (7)       |
|                                              |             | 533.45          | 1.59        | 0.04          | H <sub>2</sub> O       | (7)       |
|                                              |             | 534.9           | 1.58        | 0.055         | gp-H <sub>2</sub> O    | (7)       |
| C1s                                          | 25°C        | 282             | 1.35        | 0.367         | TiC-T <sub>x</sub>     | (8)       |
|                                              |             | 285             | 2.16        | 0.63          | C-C/CH <sub>x</sub>    | (9)       |
| C1s                                          | 200°C       | 282             | 1.38        | 0.373         | TiC-T <sub>x</sub>     | (8)       |
|                                              |             | 284.7           | 1.92        | 0.627         | C-C/CH <sub>x</sub>    | (9)       |
| F1s                                          | 25°C        | 685.2           | 1.75        | 0.86          | TiC-(O,F) <sub>x</sub> | (8)       |
|                                              |             | 686.7           | 1.27        | 0.14          | AlF <sub>x</sub>       | (10)      |
| F1s                                          | 200°C       | 685.1           | 1.6         | 0.92          | TiC-(O,F) <sub>x</sub> | (8)       |
|                                              |             | 687.5           | 1.2         | 0.08          | AlF <sub>x</sub>       | (10)      |
| Li1s                                         | 25°C        | 56.03           | 2           | 1             | Li <sup>+</sup> /LiF   | (11)      |
| Li1s                                         | 200°C       | 56.1            | 2           | 1             | Li <sup>+</sup> /LiF   | (11)      |

**Table S3. XPS peak fitting results of K-Ti<sub>3</sub>C<sub>2</sub>T<sub>x</sub> at 100 mTorr vapor pressure**

| Region                                       | Temperature | BE[eV]          | FWHM        | Fraction     | Component              | Reference |
|----------------------------------------------|-------------|-----------------|-------------|--------------|------------------------|-----------|
| Ti 2p <sub>3/2</sub><br>(2p <sub>1/2</sub> ) | 25°C        | 455.15 (460.85) | 1.7 (2.42)  | 0.11 (0.057) | Ti <sup>+</sup>        | (4)       |
|                                              |             | 455.75 (461.45) | 1.81 (1.45) | 0.12 (0.06)  | Ti <sup>2+</sup>       | (4)       |
|                                              |             | 457.07 (462.77) | 1.45 (1.8)  | 0.13 (0.066) | Ti <sup>3+</sup>       | (4)       |
|                                              |             | 458.97 (464.67) | 1.6 (2.38)  | 0.25 (0.125) | TiO <sub>2</sub>       | (5)       |
|                                              |             | 460 (465.70)    | 1.81 (3.3)  | 0.05 (0.025) | TiC-T <sub>x</sub>     | (6)       |
| Ti 2p <sub>3/2</sub><br>(2p <sub>1/2</sub> ) | 200°C       | 455.12 (460.82) | 1.7 (2.5)   | 0.1 (0.05)   | Ti <sup>+</sup>        | (4)       |
|                                              |             | 455.84 (461.54) | 1.43 (1.78) | 0.11 (0.055) | Ti <sup>2+</sup>       | (4)       |
|                                              |             | 457.02 (462.72) | 1.78 (1.68) | 0.11 (0.056) | Ti <sup>3+</sup>       | (4)       |
|                                              |             | 458.76 (464.46) | 1.6 (2.3)   | 0.28 (0.14)  | TiO <sub>2</sub>       | (5)       |
|                                              |             | 460 (465.70)    | 1.81 (3.02) | 0.06 (0.03)  | TiC-T <sub>x</sub>     | (6)       |
| O1s                                          | 25°C        | 530.32          | 1.62        | 0.52         | TiO <sub>2</sub>       | (7)       |
|                                              |             | 531.2           | 1.58        | 0.22         | TiC-O                  | (8)       |
|                                              |             | 532.40          | 1.61        | 0.098        | TiC-OH                 | (7)       |
|                                              |             | 533.30          | 1.6         | 0.072        | H <sub>2</sub> O       | (7)       |
|                                              |             | 534.8           | 1.58        | 0.097        | gp-H <sub>2</sub> O    | (7)       |
| O1s                                          | 200°C       | 530.26          | 1.62        | 0.57         | TiO <sub>2</sub>       | (7)       |
|                                              |             | 531.2           | 1.58        | 0.27         | TiC-O                  | (8)       |
|                                              |             | 532.40          | 1.58        | 0.066        | TiC-OH                 | (7)       |
|                                              |             | 533.3           | 1.62        | 0.026        | H <sub>2</sub> O       | (7)       |
|                                              |             | 534.91          | 1.58        | 0.067        | gp-H <sub>2</sub> O    | (7)       |
| C1s                                          | 25°C        | 282             | 1.33        | 0.48         | TiC-T <sub>x</sub>     | (8)       |
|                                              |             | 284.95          | 2.3         | 0.52         | C-C/CH <sub>x</sub>    | (9)       |
| C1s                                          | 200°C       | 282             | 1.39        | 0.41         | TiC-T <sub>x</sub>     | (8)       |
|                                              |             | 284.84          | 1.94        | 0.59         | C-C/CH <sub>x</sub>    | (9)       |
| F1s                                          | 25°C        | 684.8           | 1.9         | 0.93         | TiC-(O,F) <sub>x</sub> | (8)       |
|                                              |             | 686.9           | 1.46        | 0.07         | AlF <sub>x</sub>       | (10)      |
| F1s                                          | 200°C       | 684.81          | 1.92        | 0.8          | TiC-(O,F) <sub>x</sub> | (8)       |
|                                              |             | 686.94          | 1.75        | 0.2          | AlF <sub>x</sub>       | (10)      |
| K 2p <sub>3/2</sub> (2p <sub>1/2</sub> )     | 25°C        | 293.22 (296.26) | 1.33 (1.22) | 1            | K <sup>+</sup>         | (12)      |
| K 2p <sub>3/2</sub> (2p <sub>1/2</sub> )     | 200°C       | 293.2 (296.24)  | 1.6 (1.7)   | 1            | K <sup>+</sup>         | (12)      |

**Table S4. Mole number of -O group in MXene samples at 25°C and 200°C at 1 mTorr and 100 mTorr vapor pressure**

| Sample                                           | Temperature | 1 mTorr | 100 mTorr |
|--------------------------------------------------|-------------|---------|-----------|
| Ti <sub>3</sub> C <sub>2</sub> T <sub>x</sub>    | 25°C        | 0.7     | 0.8       |
|                                                  | 200°C       | 0.7     | 0.7       |
| Li-Ti <sub>3</sub> C <sub>2</sub> T <sub>x</sub> | 25°C        | 0.8     | 0.7       |
|                                                  | 200°C       | 0.8     | 0.7       |
| K-Ti <sub>3</sub> C <sub>2</sub> T <sub>x</sub>  | 25°C        | 0.9     | 0.8       |
|                                                  | 200°C       | 0.9     | 0.9       |

**Table S5. Mole number of -OH group in MXene samples at 25°C and 200°C at 1 mtorr and 100 mTorr vapor pressure**

| Sample                                           | Temperature | 1 mTorr | 100 mTorr |
|--------------------------------------------------|-------------|---------|-----------|
| Ti <sub>3</sub> C <sub>2</sub> T <sub>x</sub>    | 25°C        | 0.6     | 0.5       |
|                                                  | 200°C       | 0.5     | 0.5       |
| Li-Ti <sub>3</sub> C <sub>2</sub> T <sub>x</sub> | 25°C        | 0.6     | 0.6       |
|                                                  | 200°C       | 0.5     | 0.5       |
| K-Ti <sub>3</sub> C <sub>2</sub> T <sub>x</sub>  | 25°C        | 0.4     | 0.3       |
|                                                  | 200°C       | 0.2     | 0.2       |

**Table S6. R<sup>2</sup> values for the regression analysis of areal fraction of adsorbed H<sub>2</sub>O, -OH, -O and TiO<sub>2</sub> in MXenes at 100 mTorr with increasing temperature**

| Sample                                           | H <sub>2</sub> O | -OH  | -O   | TiO <sub>2</sub> |
|--------------------------------------------------|------------------|------|------|------------------|
| Ti <sub>3</sub> C <sub>2</sub> T <sub>x</sub>    | 0.98             | 0.43 | 0.56 | 0.98             |
| Li-Ti <sub>3</sub> C <sub>2</sub> T <sub>x</sub> | 0.94             | 0.87 | 0.99 | 0.97             |
| K-Ti <sub>3</sub> C <sub>2</sub> T <sub>x</sub>  | 0.92             | 0.99 | 0.34 | 0.99             |

**Table S7. R<sup>2</sup> values for the regression analysis of areal fraction of water in MXenes at different vapor pressure**

| Sample                                           | Temperature | R <sup>2</sup> |
|--------------------------------------------------|-------------|----------------|
| Ti <sub>3</sub> C <sub>2</sub> T <sub>x</sub>    | 25°C        | 0.98           |
|                                                  | 200°C       | 0.58           |
| Li-Ti <sub>3</sub> C <sub>2</sub> T <sub>x</sub> | 25°C        | 0.99           |
|                                                  | 200°C       | 0.20           |
| K-Ti <sub>3</sub> C <sub>2</sub> T <sub>x</sub>  | 25°C        | 0.99           |
|                                                  | 200°C       | 0.75           |

**Table S8. Relative sensitivity factors (RSF) for all elements in XPS analysis, carried out using 800eV excitation energy**

| Element | RSF  |
|---------|------|
| Ti2p    | 3.7  |
| O1s     | 1    |
| C1s     | 1    |
| F1s     | 0.39 |
| Li1s    | 0.03 |
| K2p     | 3.4  |

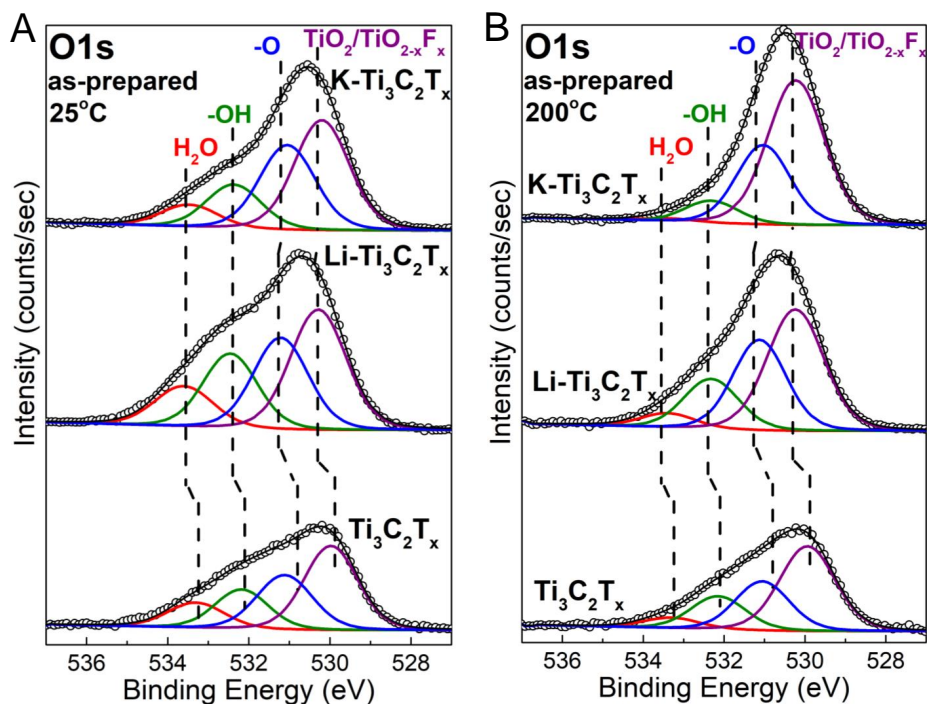

Fig. S1. O1s spectra of as-prepared samples in UHV at (a) 25°C and (b) 200°C

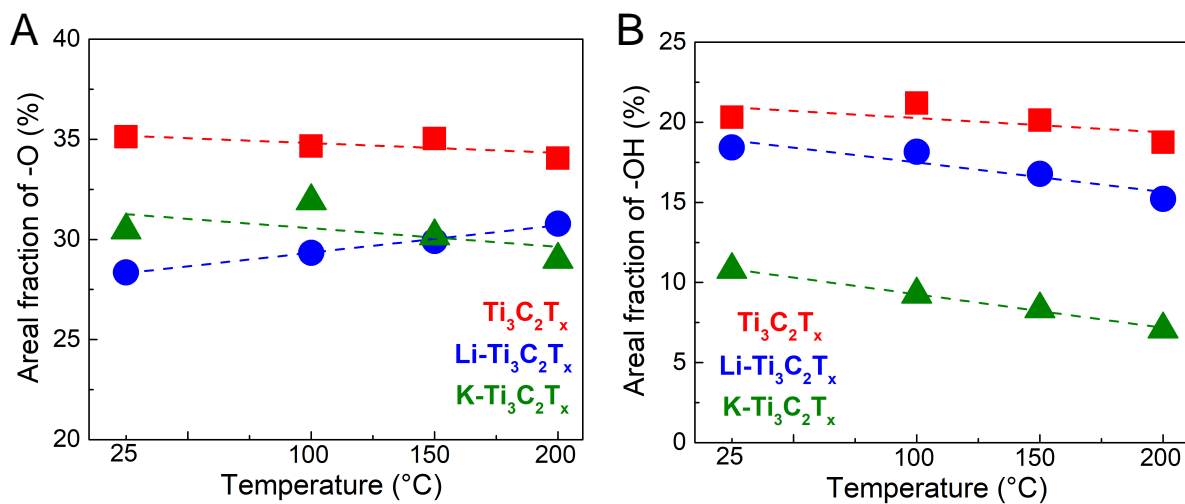

Fig. S2. O1s spectra at 100 mTorr, changes in (a) -O coverage and (b) -OH coverage with increasing temperature. The coverage in (a) and (b) was normalized with respect to the total fraction of -O, -OH, H<sub>2</sub>O and TiO<sub>2</sub>

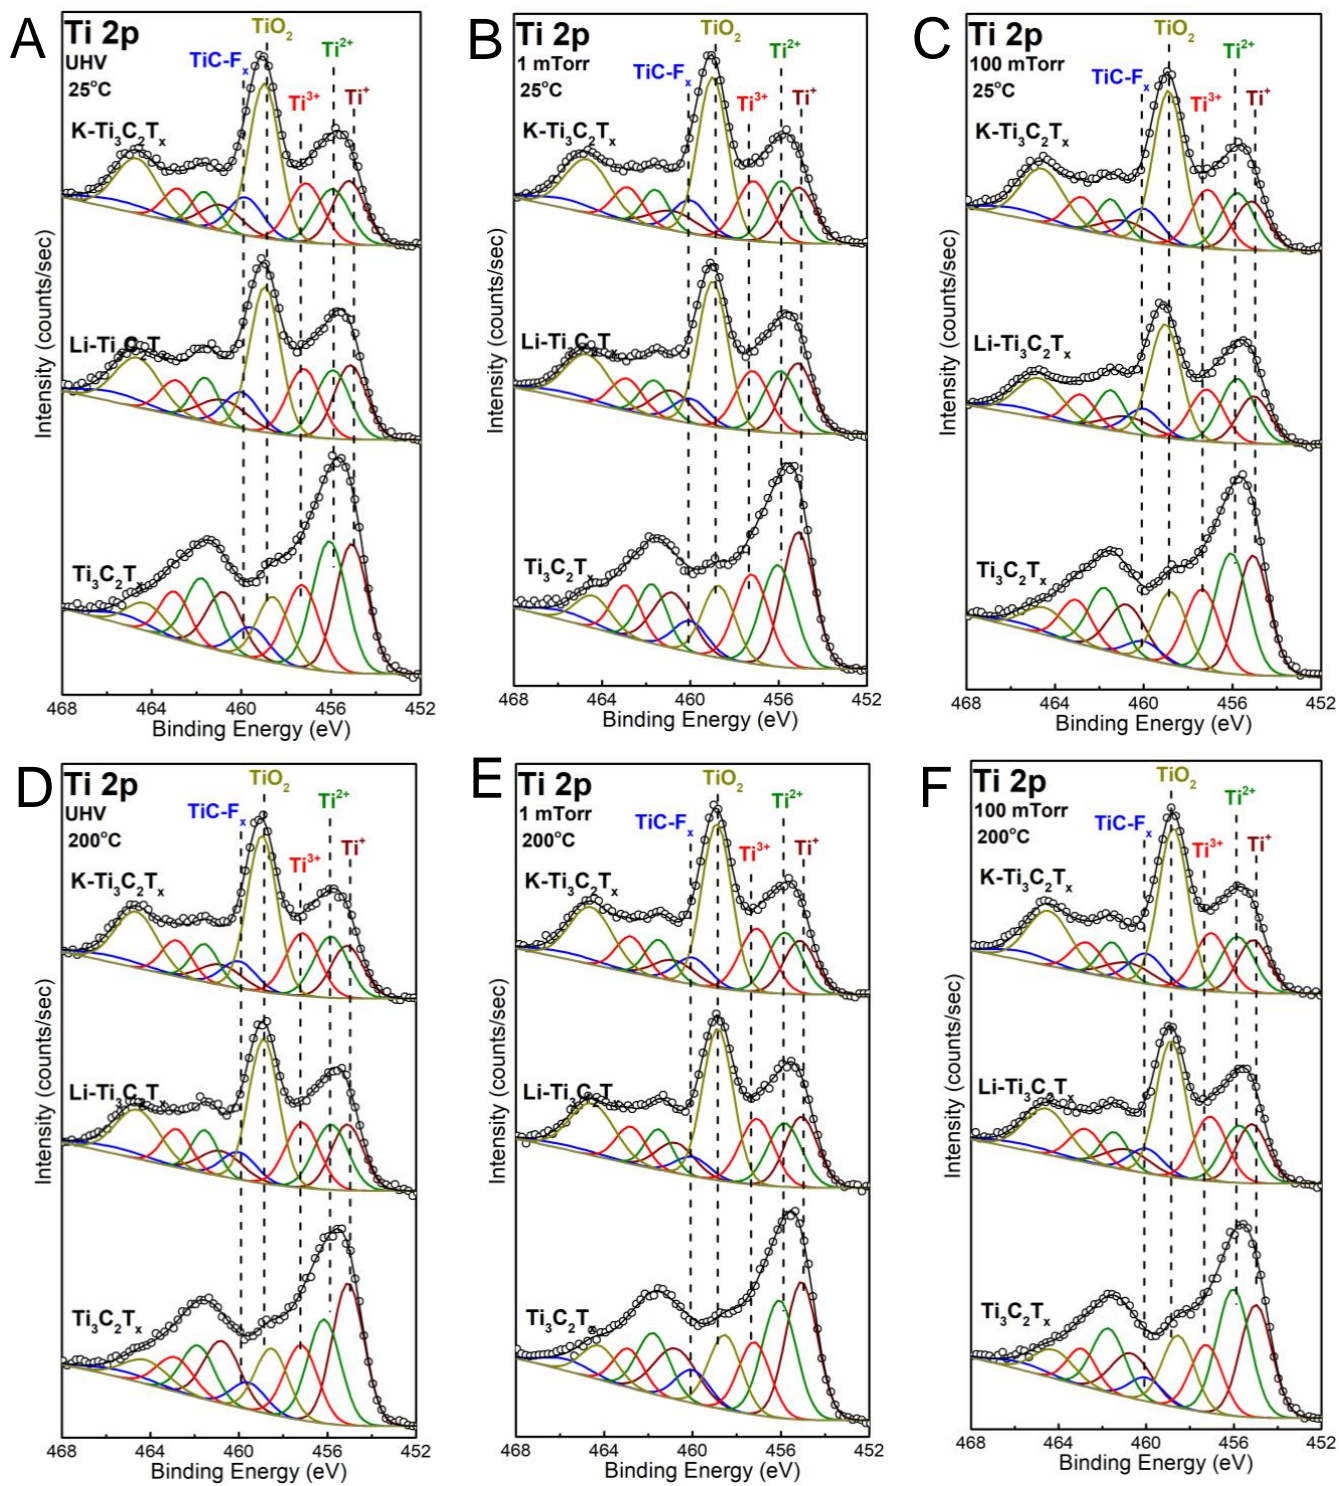

Fig. S3. Ti2p spectra at (a,d) UHV, (b,e) 1 mTorr and (c,f) 100 mTorr vapor pressure at 25°C and 200°C



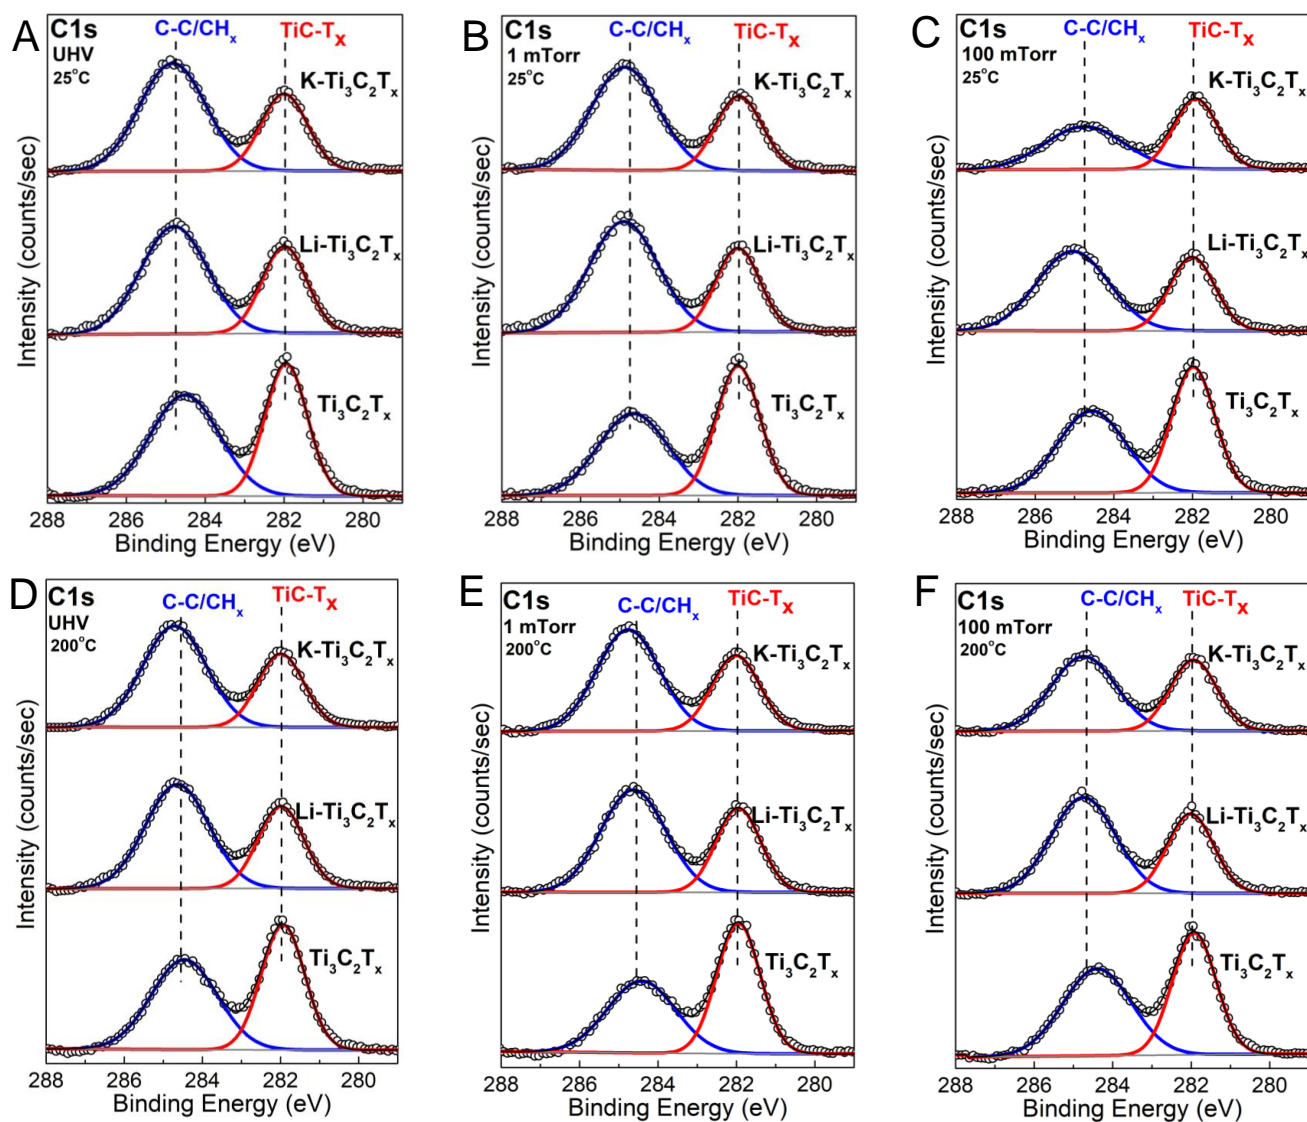

Fig. S4. C1s spectra at (a,d) UHV, (b,e) 1 mTorr and (c,f) 100 mTorr vapor pressure at 25°C and 200°C

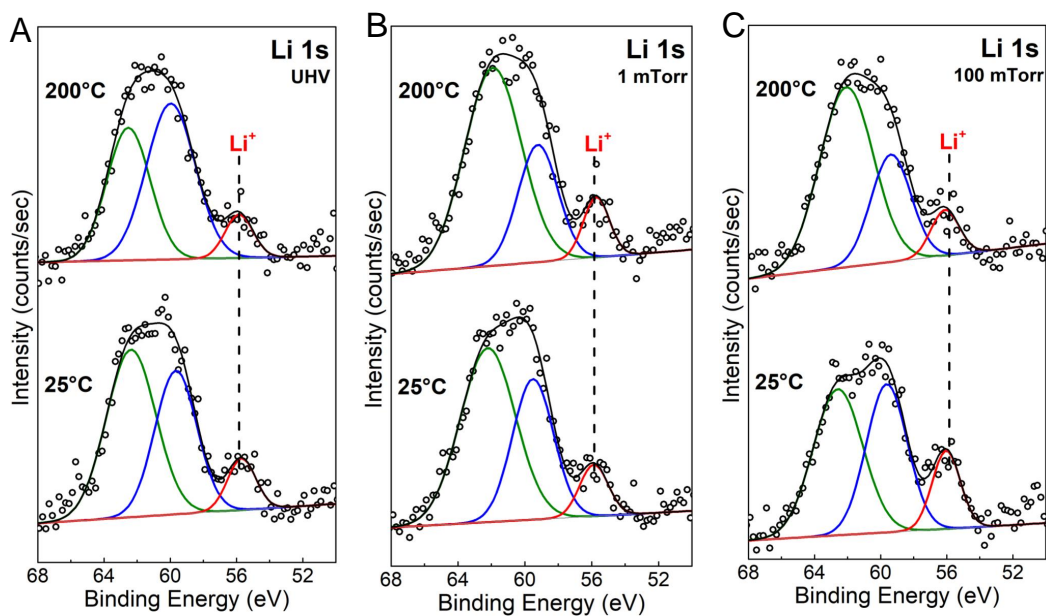

Fig. S5. Li1s spectra at (a) UHV, (b) 1 mTorr and (c) 100 mTorr vapor pressure at 25°C and 200°C

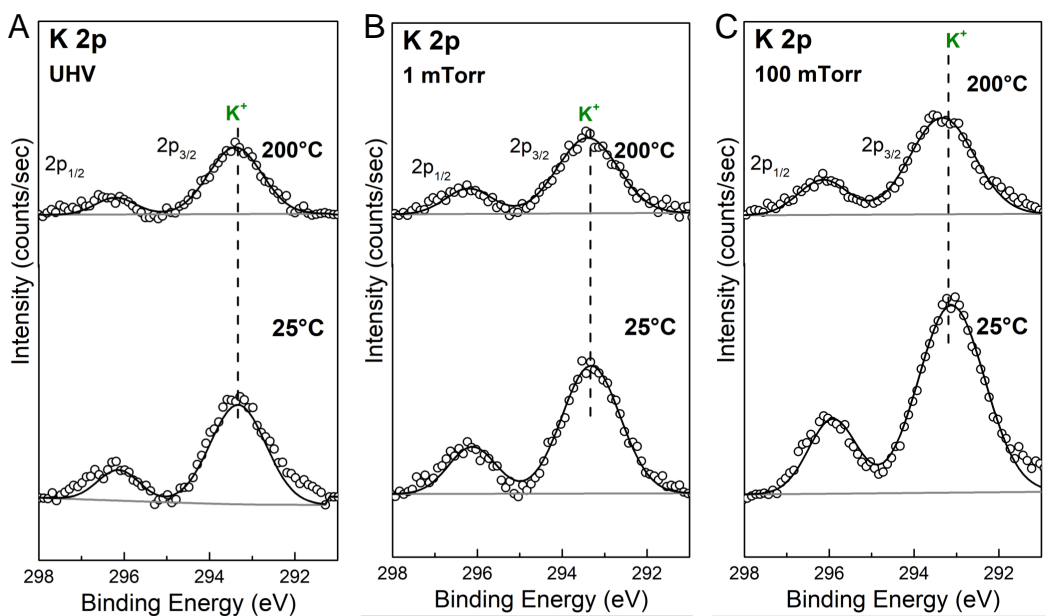

Fig. S6. K2p spectra at (a) UHV, (b) 1 mTorr and (c) 100 mTorr vapor pressure at 25°C and 200°C

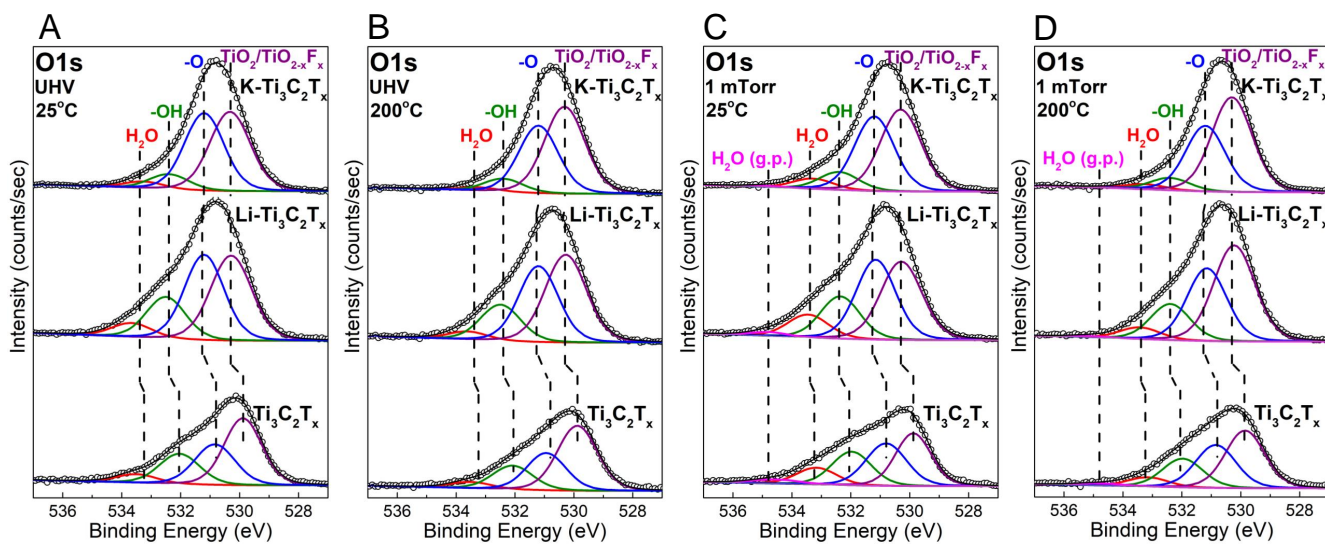

Fig. S7. O1s spectra at (a,b) UHV and (c,d) 1 mTorr vapor pressure at 25°C and 200°C

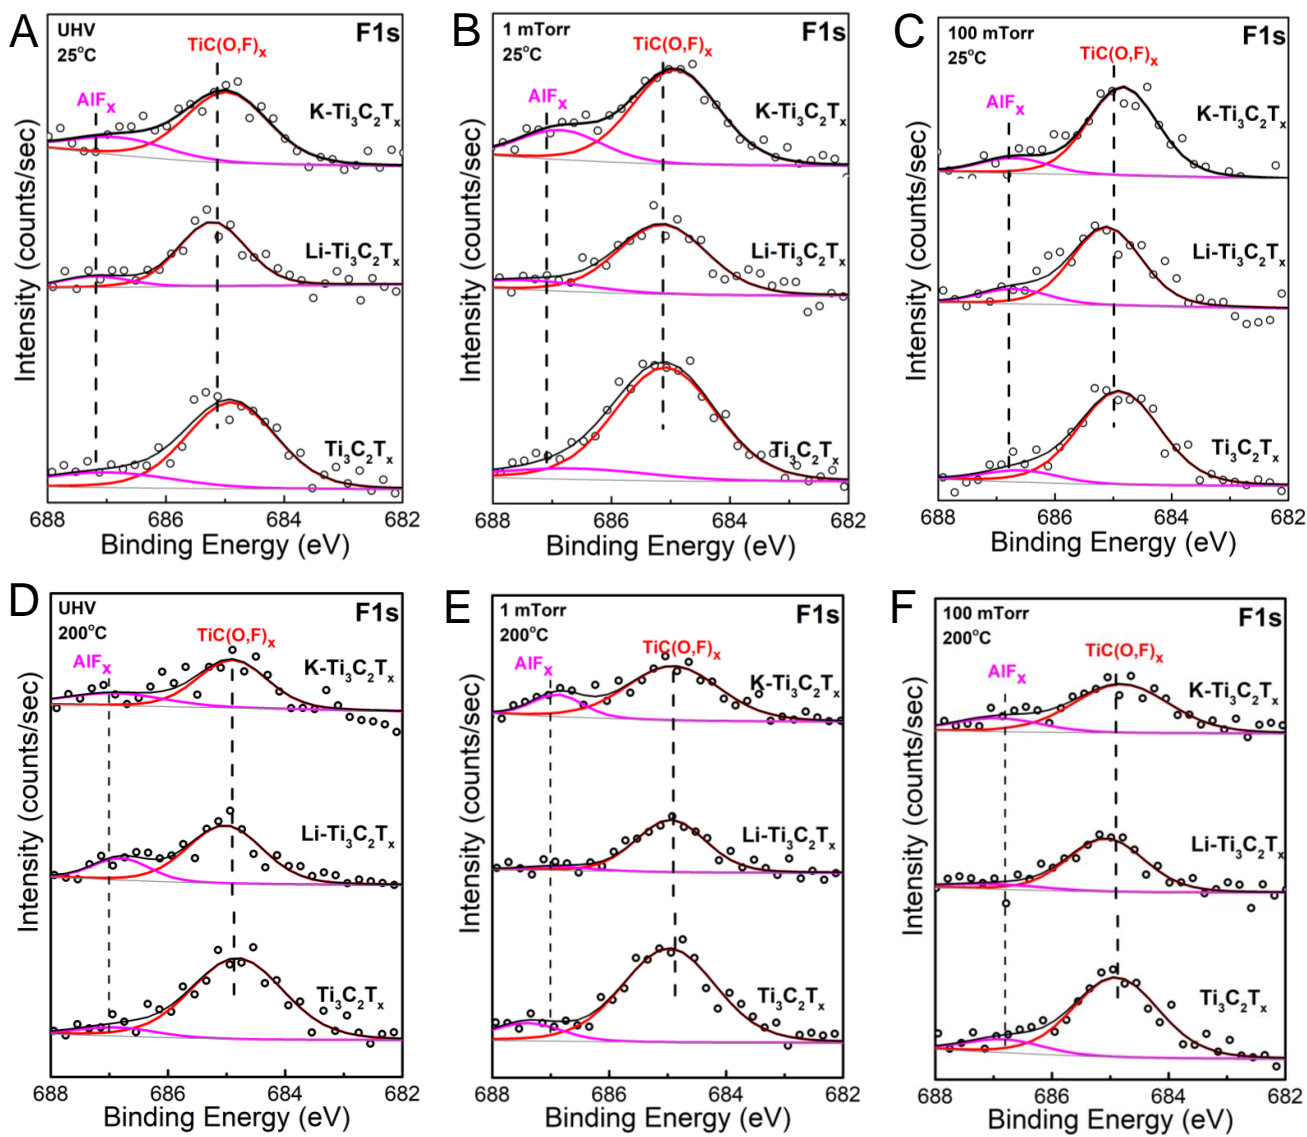

Fig. S8. F1s spectra at (a,d) UHV, (b,e) 1 mTorr and (c,f) 100 mTorr vapor pressure at 25°C and 200°C

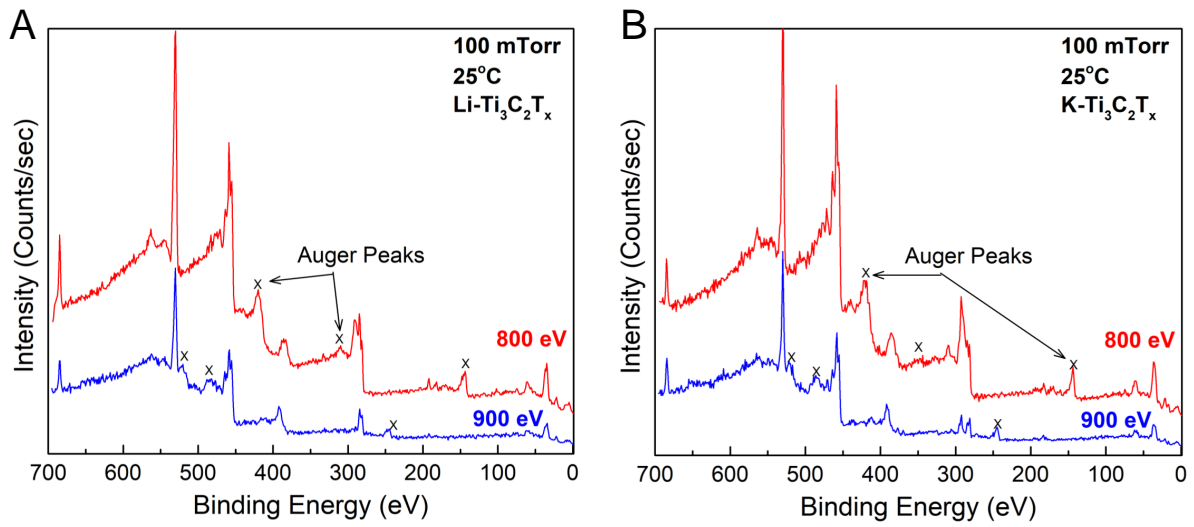

Fig. S9. Full spectra of (a)  $\text{Li-Ti}_3\text{C}_2\text{T}_x$  and (b)  $\text{K-Ti}_3\text{C}_2\text{T}_x$  at 800eV and 900eV showing appearance of Auger peaks

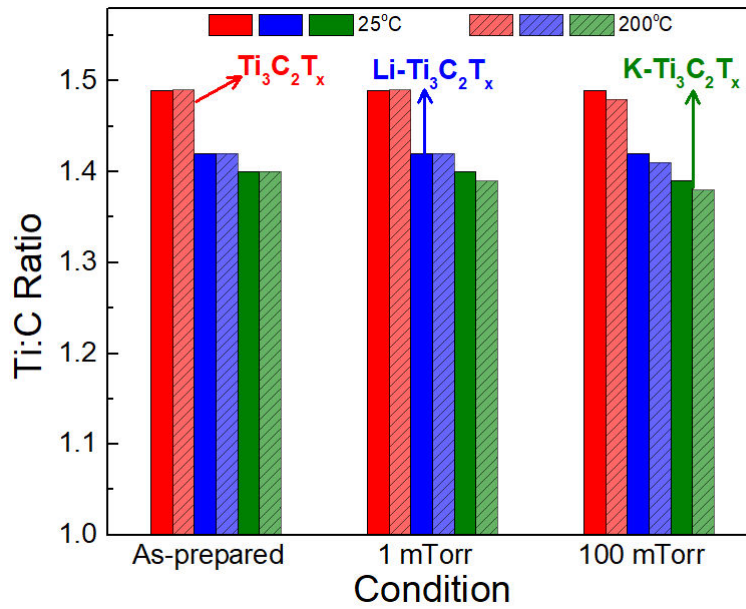

Fig. S10. Ti:C ratio of the MXenes at different conditions

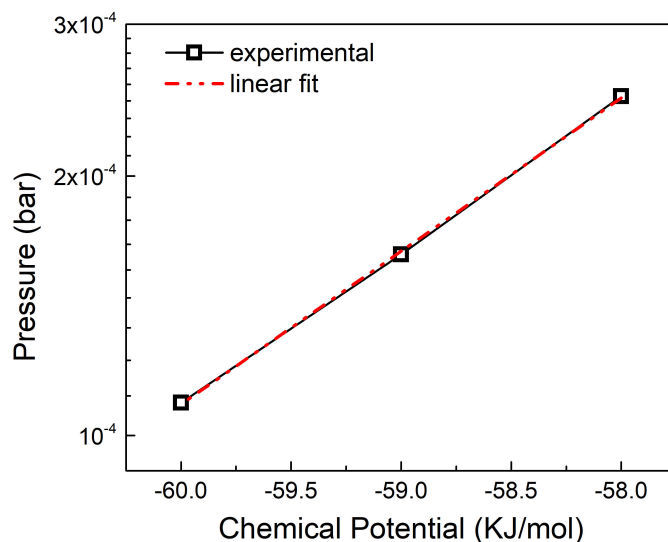

Fig. S11. Chemical Potential as a function of Pressure in a system of bulk SPC/E water

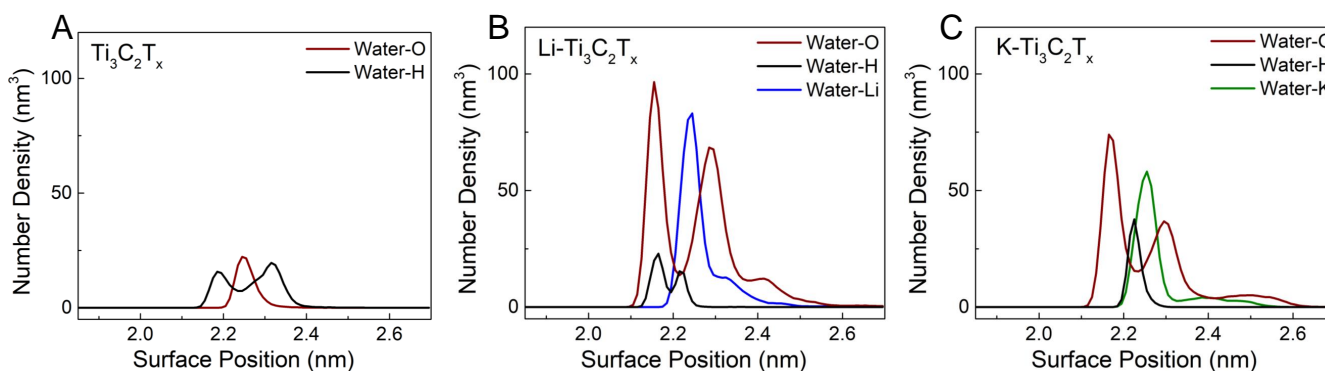

Fig. S12. Number density profiles for (a)  $\text{Ti}_3\text{C}_2\text{T}_x$ , (b)  $\text{Li-Ti}_3\text{C}_2\text{T}_x$  and (c)  $\text{K-Ti}_3\text{C}_2\text{T}_x$ .

. Surface position at 0.0 nm corresponds to the maximum z-coordinate of the MXene sheet.

## References

1. S Tanuma, CJ Powell, DR Penn, Calculations of electron inelastic mean free paths. IX. Data for 41 elemental solids over the 50 eV to 30 keV range. *Surf. Interface Analysis* **43**, 689–713 (2011).
2. JJ Yeh, I Lindau, Atomic subshell photoionization cross sections and asymmetry parameters:  $1 \leq Z \leq 103$ . *At. Data Nucl. Data Tables* **32**, 1–155 (1985).
3. NIST Standard Reference Database 71, URL: <https://www.nist.gov/srd/nist-standard-reference-database-71>. (2021).
4. V Schier, J Halbritter, K Karlsruhe, ARXPS-analysis of sputtered TiC, SiC and  $\text{Ti}_0.5\text{Si}_0.5\text{C}$  layers. *J. Anal. Chem.*, 227–232 (1993).
5. F Santerre, MA El Khakani, M Chaker, JP Dodelet, Properties of TiC thin films grown by pulsed laser deposition. *Appl. Surf. Sci.* **148**, 24–33 (1999).
6. T Sultana, et al., XPS analysis of laser transmission micro-joint between poly (vinylidene fluoride) and titanium. *Appl. Surf. Sci.* **255**, 2569–2573 (2008).
7. S Yamamoto, et al., In situ x-ray photoelectron spectroscopy studies of water on metals and oxides at ambient conditions. *J. Phys. Condens. Matter* **20** (2008).
8. J Halim, et al., X-ray photoelectron spectroscopy of select multi-layered transition metal carbides (MXenes). *Appl. Surf. Sci.* **362**, 406–417 (2016).
9. PM Jayaweera, EL Quah, H Idriss, Photoreaction of ethanol on  $\text{TiO}_2(110)$  single-crystal surface. *J. Phys. Chem. C* **111**, 1764–1769 (2007).

- 60 10. Knst, D Grman, R Hauert, E Holländer, Fluorine-Induced corrosion of aluminium microchip bond pads: An XPS and  
61 AES analysis. *Surf. Interface Analysis* **21**, 691–696 (1994).
- 62 11. M Ghidui, et al., Ion-Exchange and Cation Solvation Reactions in Ti<sub>3</sub>C<sub>2</sub> MXene. *Chem. Mater.* **28**, 3507–3514 (2016).
- 63 12. A Caballero, JP Espinós, A Fernández, L Soriano, AR González-Elipe, Adsorption and oxidation of K deposited on  
64 graphite. *Surf. Sci.* **364**, 253–265 (1996).
